# Supplementary material
Source: PubMed Central journal article supplement (PMC9329241)

**Title**

Different Human Papillomavirus Types Share Early Natural History Transitions in Immunocompetent Women

**Authors**

Sally N. Adebamowo<sup>1,2</sup>, Brian Befano<sup>2,3</sup>, Li C. Cheung<sup>2</sup>, Ana Cecilia Rodriguez<sup>2</sup>, Maria Demarco<sup>2</sup>, Greg Rydzak<sup>3</sup>, Xiaojian Chen<sup>2</sup>, Carolina Porras<sup>4</sup>, Rolando Herrero<sup>4,5</sup>, Jane J. Kim,<sup>6</sup> Philip E. Castle<sup>2,7</sup>, Nicolas Wentzensen<sup>2</sup>, Aimée R. Kreimer<sup>2</sup>, Mark Schiffman<sup>2</sup>, Nicole G. Campos<sup>2,6</sup>

**Table of contents**

|                                                                                  |   |
|----------------------------------------------------------------------------------|---|
| Supplementary table 1. Weibull Hazard Ratio estimates for all HPV type clearance | 2 |
| Supplementary figure 1                                                           | 3 |
| Supplementary figure 2                                                           | 4 |

**Supplemental Table 1.** Weibull Hazard Ratio estimates for all HPV type clearance

| Model                                                              | Prevalent <30, all incident |        |             |
|--------------------------------------------------------------------|-----------------------------|--------|-------------|
|                                                                    | HR                          | 95% CI | P-trend     |
| <b>Age in groups (years)</b>                                       | 18 - 29                     | 1.00   |             |
|                                                                    | 30 - 44                     | 0.93   | 0.89 - 0.98 |
|                                                                    | 45-54                       | 1.02   | 0.89 - 1.16 |
|                                                                    | 55+                         | 0.81   | 0.70 - 0.93 |
| <b>Age in groups, subset to carcinogenic HPV types (years)</b>     | 18 - 29                     | 1.00   |             |
|                                                                    | 30 - 44                     | 0.96   | 0.90 - 1.03 |
|                                                                    | 45-54                       | 1.24   | 0.96 - 1.60 |
|                                                                    | 55+                         | 0.82   | 0.62 - 1.07 |
| <b>Age in groups, subset to non-carcinogenic HPV types (years)</b> | 18 - 29                     | 1.00   |             |
|                                                                    | 30 - 44                     | 0.89   | 0.83 - 0.95 |
|                                                                    | 45-54                       | 0.90   | 0.77 - 1.05 |
|                                                                    | 55+                         | 0.77   | 0.65 - 0.91 |
| <b>HPV carcinogenic group</b>                                      | Non-carcinogenic            | 1.00   |             |
|                                                                    | Carcinogenic                | 0.88   | 0.85 - 0.91 |
|                                                                    | HPV16                       | 1.00   |             |
|                                                                    | HPV 18/45                   | 1.09   | 1.00 - 1.19 |
| <b>HPV group</b>                                                   | HPV 31/33/35/52/58          | 1.03   | 0.95 - 1.10 |
|                                                                    | HPV 39/51/56/59             | 1.20   | 1.12 - 1.29 |
|                                                                    | Non-carcinogenic            | 1.25   | 1.16 - 1.34 |
|                                                                    | 18 - 29                     | 1.00   |             |
| <b>Age (years) + carcinogenic group</b>                            | 30 - 44                     | 0.92   | 0.88 - 0.97 |
|                                                                    | 45-54                       | 0.98   | 0.86 - 1.12 |
|                                                                    | 55+                         | 0.78   | 0.68 - 0.90 |
|                                                                    | Carcinogenic (12 HR)        | 0.87   | 0.85 - 0.90 |

HR = Hazard Ratios; P-trend: likelihood ratio test.

**Supplemental Figure 1.** Time to clearance defined as first negative after last positive (non-parametric Turnbull estimator) of incident infections and prevalent infections in women under 30 years of age, by HPV risk class, in NHS, ALTS, and CVT. Follow-up was truncated at 4 years in the figure, by which point nearly all infections had cleared. HPV68 was excluded from the analysis, as the SPF10-LiPA assay used in the CVT cannot distinguish HPV68 and non-carcinogenic HPV73.

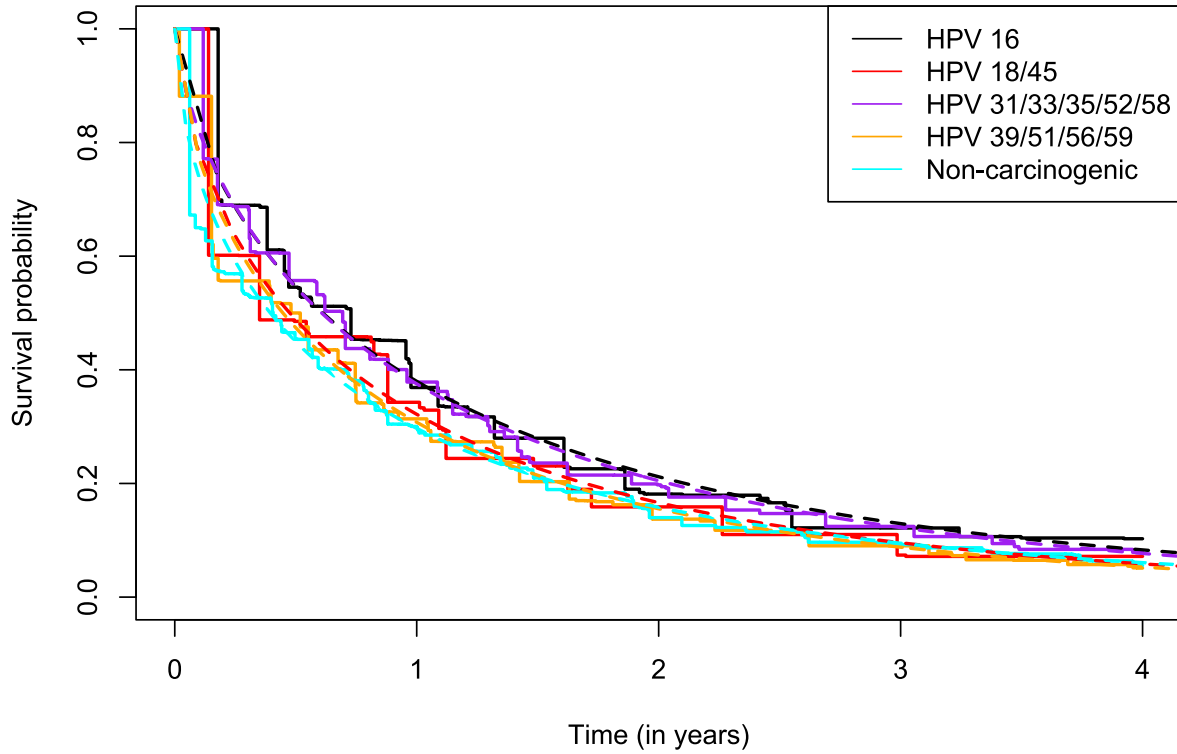

**Supplemental Figure 2** Time to clearance (non-parametric Turnbull estimator) of incident infections, including those with evidence of high-grade disease, and prevalent infections in women under 30 years of age, by HPV risk class, in NHS, ALTS, and CVT. Follow-up was truncated at 4 years in the figure, by which point nearly all infections had cleared. HPV68 was excluded from the analysis, as the SPF10-LiPA assay used in the CVT cannot distinguish HPV68 and non-carcinogenic HPV73.

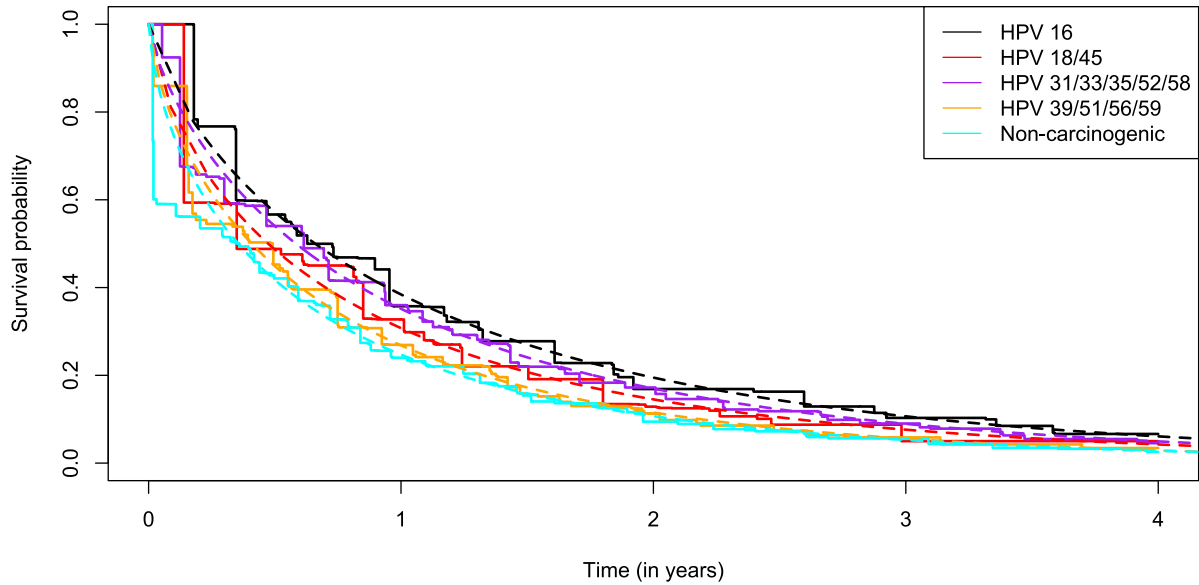

Supplement: NIHMS1809617-supplement-supinfo.pdf [file NIHMS1809617-supplement-supinfo.pdf]
